# Supplementary material for: Propofol-induced MiR-20b expression initiates endogenous cellular signal changes mitigating hypoxia/re-oxygenation-induced endothelial autophagy in vitro
Source: PubMed Central journal article supplement (PMC7442825; doi:10.1038/s41419-020-02828-9), 2020-08-13
Supplement: 41419_2020_2828_MOESM1_ESM.pdf [file 41419_2020_2828_MOESM1_ESM.pdf]

## Online supplements

Supplemental table 1. Reagents were used in the experiments

| Reagents and materials                                        | Product Code | Supplier         |
|---------------------------------------------------------------|--------------|------------------|
| Propofol                                                      | D126608      | Sigma -Aldrich   |
| Dual-Luciferase <sup>®</sup> Reporter Assay System            | E1910        | Promega          |
| polyvinylidene fluoride (PVDF) membranes                      | ISEQ00010    | Millipore        |
| Albumin Bovine V                                              | A8020        | Solarbio         |
| Lipofectamine 2000                                            | 11668027     | Invitrogen       |
| Lipofectamine 3000                                            | L3000008     | Invitrogen       |
| TransScript One-Step gDNA Removal and cDNA Synthesis SuperMix | AT311-03     | TransGen Biotech |
| Dulbecco's modified Eagle's medium (DMEM)                     | C11965500BT  | Gibco            |
| fetal bovine serum                                            | 16000044     | Gibco            |

Supplemental table 2. Primers were used for qRT-PCR

| Primer                      | sequence                                 |
|-----------------------------|------------------------------------------|
| U6 <sup>F</sup>             | 5'-CTCGCTTCGGCAGCACA-3'                  |
| U6 <sup>R</sup>             | 5'-AACGCTTCACGAATTTGCGT-3'               |
| GAPDH <sup>F</sup>          | 5'CCACCCAGAAGACTGTGGAT-3'                |
| GAPDH <sup>R</sup>          | 5'CACATTGGGGGTAGGAACAC-3'                |
| Hsa-miR-20b-5P <sup>F</sup> | 5'ATGGTTCGTGGGCAAAGTGCTCATAGTGCAGGTAG-3' |
| Hsa-miR-20b-5P <sup>R</sup> | 5'CTCAACTGGTGTCTGTGGA-3'                 |
| ULK1 <sup>F</sup>           | 5'GGTCACACGCCACATAACAG-3'                |
| ULK1 <sup>R</sup>           | 5'TGAGAATAAAGCCATCAAGGTG-3'              |
| Beclin1 <sup>F</sup>        | 5'GAAGACACAGGAGGCAGTGG-3'                |
| Beclin1 <sup>R</sup>        | 5'AGGACACCCAAGCAAGACC-3'                 |
| pri-miR-20b <sup>F</sup>    | 5'AGAGGATAAGATTGGGTCCTA-3'               |
| pri-miR-20b <sup>R</sup>    | 5'ACAAGAGATTTGTTATCCAAGA-3'              |
| METTL3 <sup>F</sup>         | 5'ACACTGCTTGGTTGGTGTCA-3'                |
| METTL3 <sup>R</sup>         | 5'AATCTTTCGAGTGCCAGGGG-3'                |

Supplemental table 3. Antibodies were used in the experiments

| Primary Antibodies                             | Product Code | Supplier         | Application |
|------------------------------------------------|--------------|------------------|-------------|
| anti-Atg1/ULK1 antibody rabbit mAb             | A7481        | Sigma -Aldrich   | WB          |
| anti-ULK1 antibody                             | ab128859     | Abcam            | WB、 IF      |
| anti-beclin1 antibody                          | ab114071     | Abcam            | WB          |
| anti-P62 mouse mAb                             | ab56416      | Abcam            | WB、 IF      |
| anti-LC3 antibody                              | ab51520      | Abcam            | WB、 IF      |
| anti-LC3                                       | L7543        | Sigma -Aldrich   | WB          |
| anti-beta-Actin antibody                       | sc-47778     | Santa Cruz       | WB          |
| anti-Flag                                      | ab1257       | Abcam            | WB          |
| anti-METTL3 antibody                           | ab195352     | Abcam            | WB          |
| anti-DGCR8 antibody                            | ab191875     | Abcam            | WB          |
| anti-GADPH Mouse Monoclonal antibody           | HC301-01     | TransGen Biotech | WB          |
| anti-TOM20 (FL-145)                            | sc-11415     | Santa Cruz       | IF          |
| Secondary Antibodies                           | Product Code | Supplier         | Application |
| HRP affinipure goat anti-rabbit IgG            | E030120      | Earthox          | WB          |
| HRP affinipure goat anti-mouse IgG             | E030110      | Earthox          | WB          |
| Alexa Fluor 488-labeled donkey anti-mouse IgG  | A21202       | Invitrogen       | IF          |
| Alexa Fluor 488-labeled donkey anti-rabbit IgG | A21206       | Invitrogen       | IF          |
| Alexa Fluor 555-labeled donkey anti-mouse IgG  | A31570       | Invitrogen       | IF          |
| Alexa Fluor 555-labeled donkey anti-rabbit IgG | A31572       | Invitrogen       | IF          |
| Alexa Fluor 647-labeled donkey anti- mouse IgG | A32787       | Invitrogen       | IF          |
| Alexa Fluor 647-labeled donkey anti-rabbit IgG | A32733       | Invitrogen       | IF          |
